# Supplementary material for: Syntheses, Structures and Properties of Alkali and Alkaline Earth Metal Diamond-Like Compounds Li2MgMSe4 (M = Ge, Sn)
Source: MDPI journal article supplement (doi:10.3390/ma14206166), 2021-10-18
Supplement: s1 [file s1]

Supporting Information

# Syntheses, Structures and Properties of Alkali and Alkaline Earth Metal Diamond-like Compounds $\text{Li}_2\text{MgMSe}_4$ (M = Ge, Sn)

Hongbo Gao <sup>1,2,†</sup>, Kewang Zhang <sup>1,3,†</sup>, Ailijiang Abudurusuli <sup>1,4</sup>, Chen Bai <sup>1</sup>, Zhihua Yang <sup>1</sup>, Kangrong Lai <sup>2</sup>, Junjie Li <sup>1,\*</sup> and Shilie Pan <sup>1,\*</sup>

<sup>1</sup> CAS Key Laboratory of Functional Materials and Devices for Special Environments, Xinjiang Technical Institute of Physics & Chemistry, CAS; Xinjiang Key Laboratory of Electronic Information Materials and Devices, 40-1 South Beijing Road, Urumqi 830011, China; hbgao21@gia.cas.cn (H.G.); zhangkewang@stu.xju.edu.cn (K.Z.); ailijiang18@mails.ucas.ac.cn (A.A.); baichen20@ms.xjb.ac.cn (C.B.); zhyang@ms.xjb.ac.cn (Z.Y.)

<sup>2</sup> Department of Physics, Changji University, Changji 831100, China; laikr0212@cjc.edu.cn

<sup>3</sup> College of Physical Science and Technology, Xinjiang University, Urumqi 830046, China

<sup>4</sup> Center of Materials Science and Optoelectronics Engineering, University of Chinese Academy of Sciences, Beijing 100049, China

\* Correspondence: lijunjie@ms.xjb.ac.cn (J.L.); slpan@ms.xjb.ac.cn (S.P.)

† These authors contributed equally.

\* The calculated details for the contribution of each PDOS on the band gaps in  $\text{Li}_2\text{MgSnSe}_4$ ,  $\text{Li}_2\text{MgGeSe}_4$ .

The contribution of each PDOS on the band gaps was calculated from the following formula:

$$\%_{\text{contribution}} = \frac{S_{\text{PDOS}}}{S_{\text{TDOS}}} \quad (\text{S1})$$

Here,  $\%_{\text{contribution}}$  is the contribution of each PDOS,  $S_{\text{PDOS}}/S_{\text{TDOS}}$  is the integral of each PDOS/TDOS at near the Fermi level.

**Table S1.** Atomic coordinates and equivalent isotropic displacement parameters of  $\text{Li}_2\text{MgSnSe}_4$ .  $U(\text{eq})$  is defined as one third of the trace of the orthogonalized  $U_{ij}$  tensor.

| Atom  | x           | y           | z           | U(eq)    |
|-------|-------------|-------------|-------------|----------|
| Sn(1) | 0           | 3280.6 (13) | 9172 (15)   | 15.6 (3) |
| Mg(1) | 2440 (6)    | 8297 (9)    | 9320 (50)   | 17 (4)   |
| Li(1) | 2440 (6)    | 8297 (9)    | 9320 (50)   | 17 (4)   |
| Li(2) | 0           | 6540 (30)   | 4000 (200)  | 16 (14)  |
| Se(1) | 0           | 6574 (2)    | 7943 (3)    | 19.1 (4) |
| Se(2) | 0           | 3211 (2)    | 12929 (3)   | 18.5 (5) |
| Se(3) | 2467.9 (13) | 1665.7 (16) | 7982.1 (19) | 18.4 (4) |

**Table S2.** Anisotropic displacement parameters ( $\text{\AA}^2 \times 10^3$ ) of  $\text{Li}_2\text{MgSnSe}_4$ .

| Atom  | $U_{11}$ | $U_{22}$ | $U_{33}$  | $U_{23}$  | $U_{13}$ | $U_{12}$ |
|-------|----------|----------|-----------|-----------|----------|----------|
| Sn(1) | 17.8 (5) | 17.1 (5) | 11.9 (7)  | 0.5 (8)   | 0        | 0        |
| Mg(1) | 24 (4)   | 22 (4)   | 6 (11)    | 3 (5)     | 4 (5)    | -3 (2)   |
| Li(1) | 24 (4)   | 22 (4)   | 6 (11)    | 3 (5)     | 4 (5)    | -3 (2)   |
| Li(2) | 27 (13)  | 13 (12)  | 10 (40)   | 0 (20)    | 0        | 0        |
| Se(1) | 20.6 (8) | 17.9 (8) | 18.6 (11) | 3.6 (13)  | 0        | 0        |
| Se(2) | 18.0 (8) | 23.5 (8) | 14.1 (12) | 2.5 (18)  | 0        | 0        |
| Se(3) | 19.8 (6) | 21.1 (6) | 14.5 (10) | -0.8 (10) | 3.1 (6)  | 2.0 (4)  |

**Table S3.** Symmetry, selected bond lengths and angles of crystal data and structural refinements of  $\text{Li}_2\text{MgSnSe}_4$ .

|               |            |                       |           |
|---------------|------------|-----------------------|-----------|
| Sn(1)-Se(1)   | 2.505 (5)  | Se(1)-Sn(1)-Se(2)     | 110.4 (3) |
| Sn(1)-Se(2)   | 2.528 (11) | Se(1)-Sn(1)-Se(3)     | 109.3 (2) |
| Sn(1)-Se(3)#1 | 2.507 (4)  | Se(1)-Sn(1)-Se(3)#1   | 109.3 (2) |
| Sn(1)-Se(3)   | 2.507 (4)  | Se(3)-Sn(1)-Se(2)     | 108.1 (2) |
| Li(1)-Se(1)   | 2.567 (14) | Se(3)#1-Sn(1)-Se(2)   | 108.1 (2) |
| Li(1)-Se(2)#2 | 2.583 (13) | Se(3)#1-Sn(1)-Se(3)   | 111.6 (3) |
| Li(1)-Se(3)#3 | 2.47 (3)   | Se(1)-Li(1)-Se(2)#2   | 109.4 (8) |
| Li(1)-Se(3)#4 | 2.581 (14) | Se(1)-Li(1)-Se(3)#3   | 109.5 (8) |
| Li(2)-Se(1)   | 2.65 (16)  | Se(3)#4-Li(1)-Se(1)   | 113.0 (7) |
| Li(2)-Se(2)#5 | 2.50 (4)   | Se(3)#3-Li(1)-Se(2)#2 | 105.0 (7) |
| Li(2)-Se(3)#2 | 2.58 (5)   | Se(3)#4-Li(1)-Se(2)#2 | 109.9 (7) |
| Li(2)-Se(3)#6 | 2.58 (5)   | Se(3)#4-Li(1)-Se(3)#3 | 109.7 (7) |
|               |            | Se(2)#5-Li(2)-Se(1)   | 107 (4)   |
|               |            | Se(2)#5-Li(2)-Se(3)#2 | 114 (3)   |
|               |            | Se(2)#5-Li(2)-Se(3)#6 | 114 (3)   |
|               |            | Se(3)#2-Li(2)-Se(1)   | 105 (3)   |
|               |            | Se(3)#6-Li(2)-Se(1)   | 105 (3)   |
|               |            | Se(3)#2-Li(2)-Se(3)#6 | 111 (3)   |

#1  $-x, y, z$  #2  $1/2 - x, 1 - y, -1/2 + z$  #3  $+x, 1 + y, z$  #4  $1/2 - x, 1 - y, 1/2 + z$ .  
 #5  $+x, y, -1 + z$  #6  $-1/2 + x, 1 - y, -1/2 + z$  #7  $-1/2 + x, 1 - y, 1/2 + z$ .  
 #8  $+x, y, 1 + z$  #9  $+x, -1 + y, z$ .

**Table S4.** Atomic coordinates and equivalent isotropic displacement parameters of  $\text{Li}_2\text{MgGeSe}_4$ .  $U(\text{eq})$  is defined as one third of the trace of the orthogonalized  $U_{ij}$  tensor.

| Atom  | x          | y           | z           | $U(\text{eq})$ |
|-------|------------|-------------|-------------|----------------|
| Ge(1) | 10000      | 1762.4 (8)  | 6416.9 (9)  | 6.43 (11)      |
| Mg(1) | 7419 (3)   | 3215 (4)    | 1428 (6)    | 10.5 (4)       |
| Li(1) | 7419 (3)   | 3215 (4)    | 1428 (6)    | 10.5 (4)       |
| Li(2) | 5000       | 1560 (20)   | 6570 (30)   | 21 (3)         |
| Se(1) | 10000      | 1840.6 (8)  | 2871.6 (8)  | 7.69 (12)      |
| Se(2) | 7654.8 (5) | 3290.6 (5)  | 7573.3 (5)  | 8.93 (9)       |
| Se(3) | 10000      | -1378.9 (8) | 7628.3 (11) | 8.60 (10)      |

**Table S5.** Anisotropic displacement parameters ( $\text{\AA}^2 \times 10^3$ ) of  $\text{Li}_2\text{MgGeSe}_4$ .

| Atom  | $U_{11}$  | $U_{22}$  | $U_{33}$  | $U_{23}$   | $U_{13}$  | $U_{12}$  |
|-------|-----------|-----------|-----------|------------|-----------|-----------|
| Ge(1) | 7.3 (2)   | 5.7 (2)   | 6.3 (2)   | 0.14 (16)  | 0         | 0         |
| Mg(1) | 9.7 (11)  | 10.7 (11) | 11.0 (11) | -0.5 (8)   | 0.7 (10)  | 0.9 (8)   |
| Li(1) | 9.7 (11)  | 10.7 (11) | 11.0 (11) | -0.5 (8)   | 0.7 (10)  | 0.9 (8)   |
| Li(2) | 17 (6)    | 27 (7)    | 20 (7)    | 12 (5)     | 0         | 0         |
| Se(1) | 6.00 (18) | 11.0 (2)  | 6.1 (3)   | 0.52 (17)  | 0         | 0         |
| Se(2) | 9.23 (14) | 7.99 (15) | 9.6 (2)   | -0.58 (17) | 2.09 (16) | 0.98 (10) |
| Se(3) | 9.95 (18) | 5.92 (19) | 9.9 (2)   | 0.9 (3)    | 0         | 0         |

**Table S6.** Symmetry, selected bond lengths and angles of crystal data and structural refinements of  $\text{Li}_2\text{MgGeSe}_4$ .

|               |            |                       |             |
|---------------|------------|-----------------------|-------------|
| Ge(1)-Se(1)   | 2.3446 (7) | Se(1)-Ge(1)-Se(2)#1   | 108.35 (2)  |
| Ge(1)-Se(2)   | 2.3487 (5) | Se(1)-Ge(1)-Se(2)     | 108.35 (2)  |
| Ge(1)-Se(2)#1 | 2.3487 (5) | Se(2)#1-Ge(1)-Se(2)   | 111.86 (3)  |
| Ge(1)-Se(3)   | 2.3422 (9) | Se(3)-Ge(1)-Se(1)     | 111.34 (3)  |
| Li(1)#1-Se(1) | 2.534 (3)  | Se(3)-Ge(1)-Se(2)     | 108.49 (2)  |
| Li(2)#4-Se(1) | 2.533 (14) | Se(3)-Ge(1)-Se(2)#1   | 108.49 (2)  |
| Li(1)#7-Se(2) | 2.564 (3)  | Se(1)-Mg(1)-Se(2)#2   | 105.77 (12) |
| Li(1)#8-Se(2) | 2.557 (4)  | Se(1)-Mg(1)-Se(2)#3   | 108.58 (11) |
| Li(1)#9-Se(3) | 2.512 (3)  | Se(2)#3-Mg(1)-Se(2)#2 | 106.03 (11) |
| Li(1)#5-Se(3) | 2.512 (3)  | Se(3)#4-Mg(1)-Se(1)   | 111.20 (12) |
| Li(2)#5-Se(3) | 2.610 (18) | Se(3)#4-Mg(1)-Se(2)#2 | 112.13 (11) |
| Li(2)-Se(1)#5 | 2.533 (14) | Se(3)#4-Mg(1)-Se(2)#3 | 112.74 (12) |
| Li(2)-Se(2)   | 2.600 (9)  | Se(1)#5-Li(2)-Se(2)   | 110.6 (4)   |
| Li(2)-Se(2)#6 | 2.600 (9)  | Se(1)#5-Li(2)-Se(2)#6 | 110.6 (4)   |
| Li(2)-Se(3)#4 | 2.610 (18) | Se(1)#5-Li(2)-Se(3)#4 | 107.0 (6)   |
|               |            | Se(2)-Li(2)-Se(2)#6   | 115.8 (6)   |
|               |            | Se(2)#6-Li(2)-Se(3)#4 | 106.1 (4)   |
|               |            | Se(2)-Li(2)-Se(3)#4   | 106.1 (4)   |

#1  $2-x, +y, +z$  #2  $3/2-x, 1-y, -1/2+z$  #3  $+x, +y, -1+z$  #4  $3/2-x, -y, -1/2+z$ .#5  $3/2-x, -y, 1/2+z$  #6  $1-x, 1+y, +z$  #7  $+x, +y, +z$ .#8  $3/2-x, 1-y, 1/2+z$  #9  $1/2+x, -y, 1/2+z$ .**Table S7.** Atomic parameters of  $\text{Li}_2\text{MgSnSe}_4$  and  $\text{Li}_2\text{MgGeSe}_4$ .

| $\text{Li}_2\text{MgSnSe}_4$ |              |        | $\text{Li}_2\text{MgGeSe}_4$ |              |        |
|------------------------------|--------------|--------|------------------------------|--------------|--------|
| Atom                         | Wyckoff Site | S.O.F. | Atom                         | Wyckoff Site | S.O.F. |
| Sn(1)                        | 2a           |        | Ge(1)                        | 2a           |        |
| Mg(1)                        | 4b           | 0.5    | Mg(1)                        | 4b           | 0.5    |
| Li(1)                        | 4b           | 0.5    | Li(1)                        | 4b           | 0.5    |
| Li(2)                        | 2a           |        | Li(2)                        | 2a           |        |
| Se(1)                        | 2a           |        | Se(1)                        | 2a           |        |
| Se(2)                        | 2a           |        | Se(2)                        | 4b           |        |
| Se(3)                        | 4b           |        | Se(3)                        | 2a           |        |

**Table S8.** The refined structural parameters of  $\text{Li}_2\text{MgSnSe}_4$ .

| <b><math>\text{Li}_2\text{MgSnSe}_4</math></b> |                        |
|------------------------------------------------|------------------------|
| <i>a</i>                                       | 8.402 Å                |
| <i>b</i>                                       | 7.181 Å                |
| <i>c</i>                                       | 6.728 Å                |
| $\alpha = \beta = \gamma$                      | 90 °                   |
| <i>V</i> (Å <sup>3</sup> )                     | 405.932 Å <sup>3</sup> |
| <i>Rwp</i> (%)                                 | 10.29 %                |
| <i>Rp</i> (%)                                  | 7.47 %                 |
| $\chi^2$                                       | 11.70                  |

**Table S9.** The crystallographic data of  $\text{Li}_2\text{MgMSe}_4$  (M = Sn, Ge).

| <b>Li<sub>2</sub>MgSnSe<sub>4</sub></b> |              |              |              |              |              |
|-----------------------------------------|--------------|--------------|--------------|--------------|--------------|
| <b><i>Pmn</i>2<sub>1</sub> (No.31)</b>  |              |              |              |              |              |
| <b>Cell parameters</b>                  |              |              |              |              |              |
| <i>a</i> (Å)                            | <i>b</i> (Å) | <i>c</i> (Å) | <i>α</i> (°) | <i>β</i> (°) | <i>γ</i> (°) |
| 8.402                                   | 7.181        | 6.728        | 90           | 90           | 90           |
| <b>Fractional coordinates</b>           |              |              |              |              |              |
| Atoms                                   | x            | y            | z            |              |              |
| Li                                      | 0.00000      | 0.65400      | 0.40000      |              |              |
| Li(0.5)/Mg(0.5)                         | 0.24400      | 0.82970      | 0.93200      |              |              |
| Sn                                      | 0.00000      | 0.32806      | 0.91720      |              |              |
| Se1                                     | 0.00000      | 0.65740      | 0.79430      |              |              |
| Se2                                     | 0.00000      | 0.32110      | 1.29290      |              |              |
| Se3                                     | 0.24679      | 0.16657      | 0.79821      |              |              |
| <b>Li<sub>2</sub>MgGeSe<sub>4</sub></b> |              |              |              |              |              |
| <b><i>Pmn</i>2<sub>1</sub> (No.31)</b>  |              |              |              |              |              |
| <b>Cell parameters</b>                  |              |              |              |              |              |
| <i>a</i> (Å)                            | <i>b</i> (Å) | <i>c</i> (Å) | <i>α</i> (°) | <i>β</i> (°) | <i>γ</i> (°) |
| 8.296                                   | 7.007        | 6.612        | 90           | 90           | 90           |
| <b>Fractional coordinates</b>           |              |              |              |              |              |
| Atoms                                   | x            | y            | z            |              |              |
| Li                                      | 0.50000      | 0.15600      | 0.65700      |              |              |
| Li(0.5)/Mg(0.5)                         | 0.74190      | 0.32150      | 0.14280      |              |              |
| Ge                                      | 1.00000      | 0.17624      | 0.64169      |              |              |
| Se1                                     | 1.00000      | 0.18406      | 0.28716      |              |              |
| Se2                                     | 0.76548      | 0.32906      | 0.75733      |              |              |
| Se3                                     | 1.00000      | −0.13789     | 0.76283      |              |              |

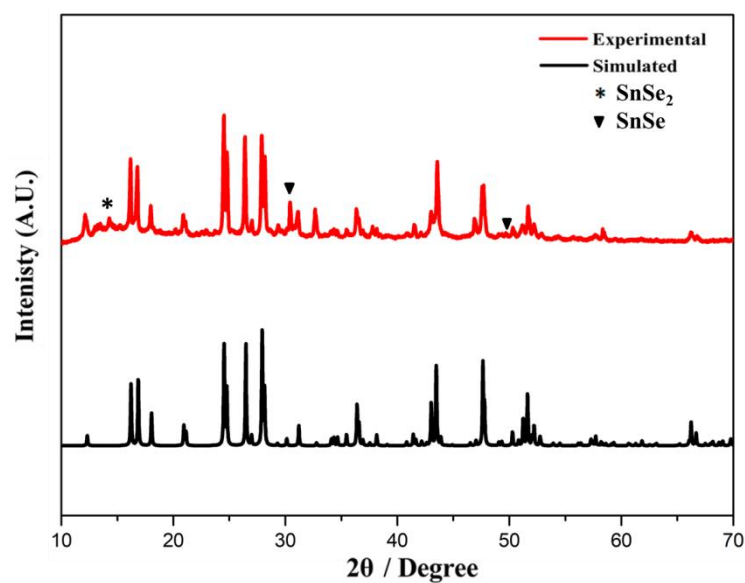

Figure S1. Experimental and calculated PXRD patterns of  $\text{Li}_2\text{MgSnSe}_4$ .

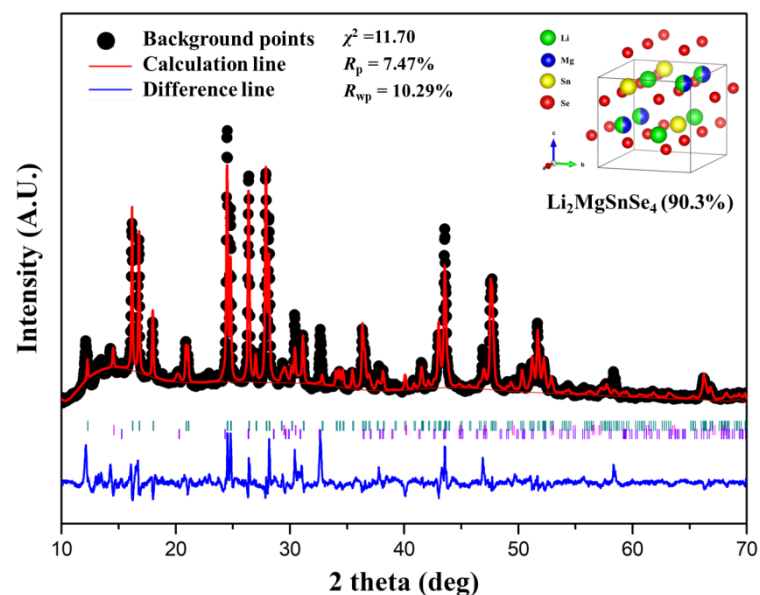

Figure S2. The PXRD Rietveld refinement of the obtained  $\text{Li}_2\text{MgSnSe}_4$  samples.

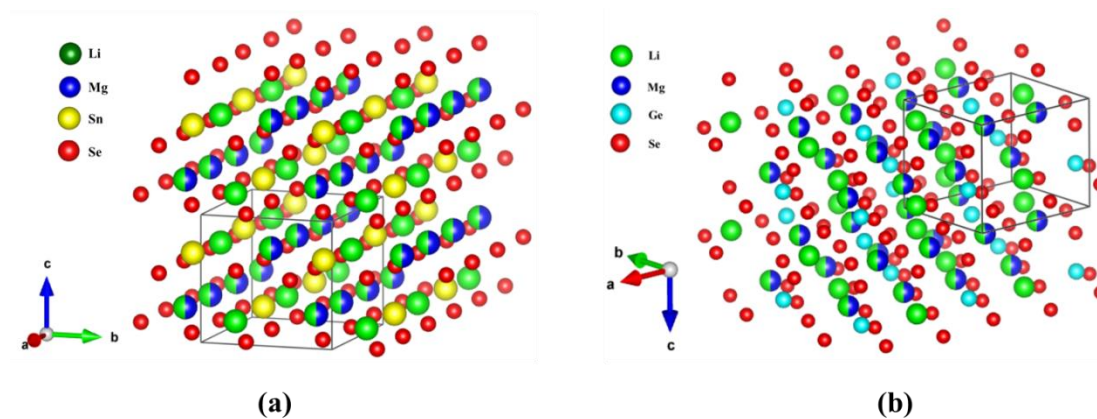

Figure S3. The atomic models of (a)  $\text{Li}_2\text{MgSnSe}_4$  and (b)  $\text{Li}_2\text{MgGeSe}_4$ .
